# Supplementary material for: NF-κB signaling in tanycytes mediates inflammation-induced anorexia
Source: PubMed Central journal article supplement — Mol Metab. 2020 May 21;39:101022. doi: 10.1016/j.molmet.2020.101022 (PMC7292913; doi:10.1016/j.molmet.2020.101022), 2020-05-21

Supplementary Figure 1

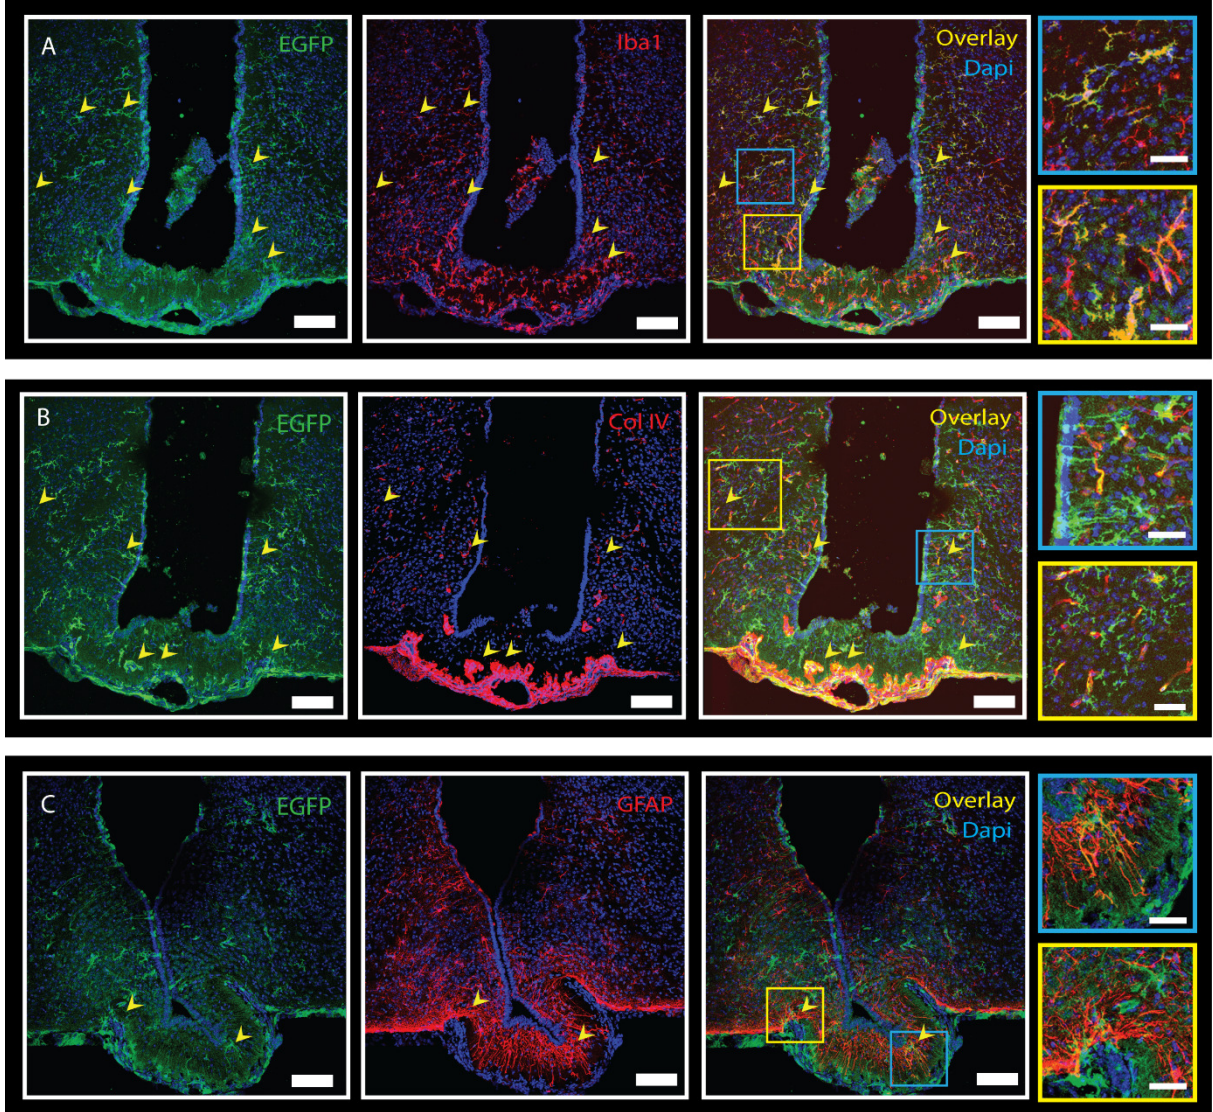

Supplementary Figure 2

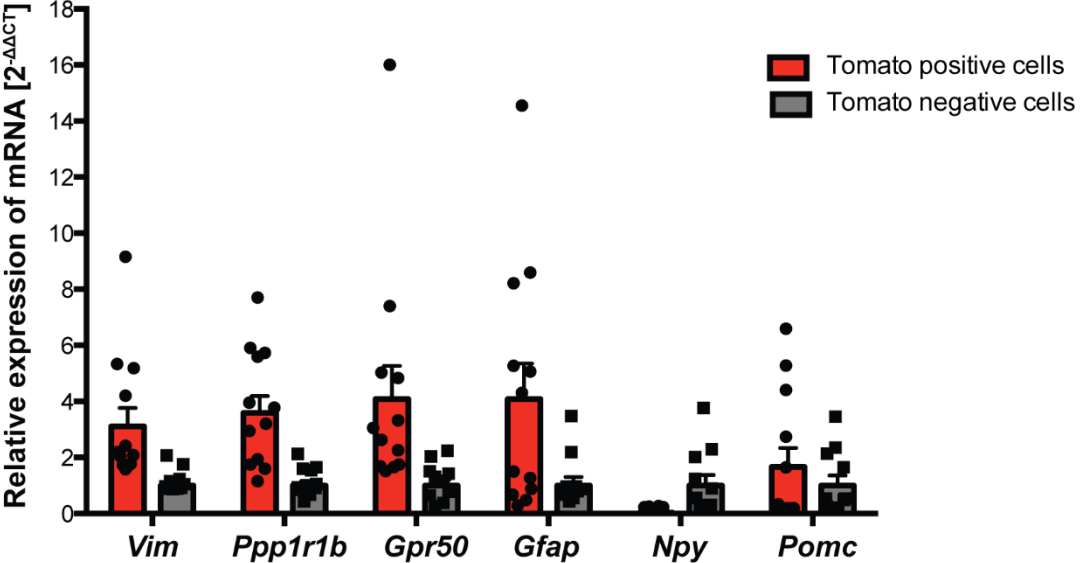

Supplementary Figure 3

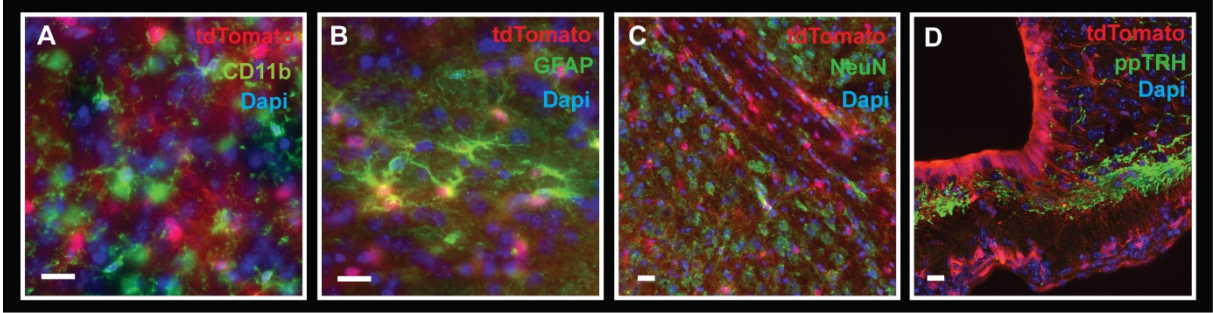

Supplementary Figure 4

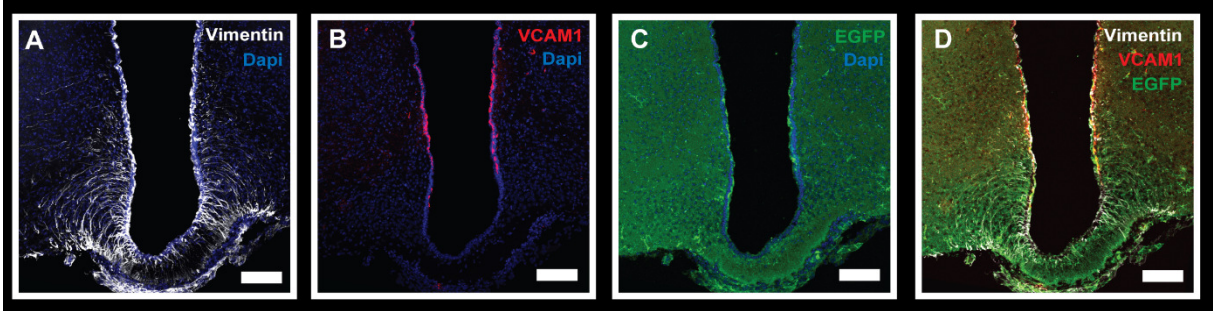

Supplementary Figure 5

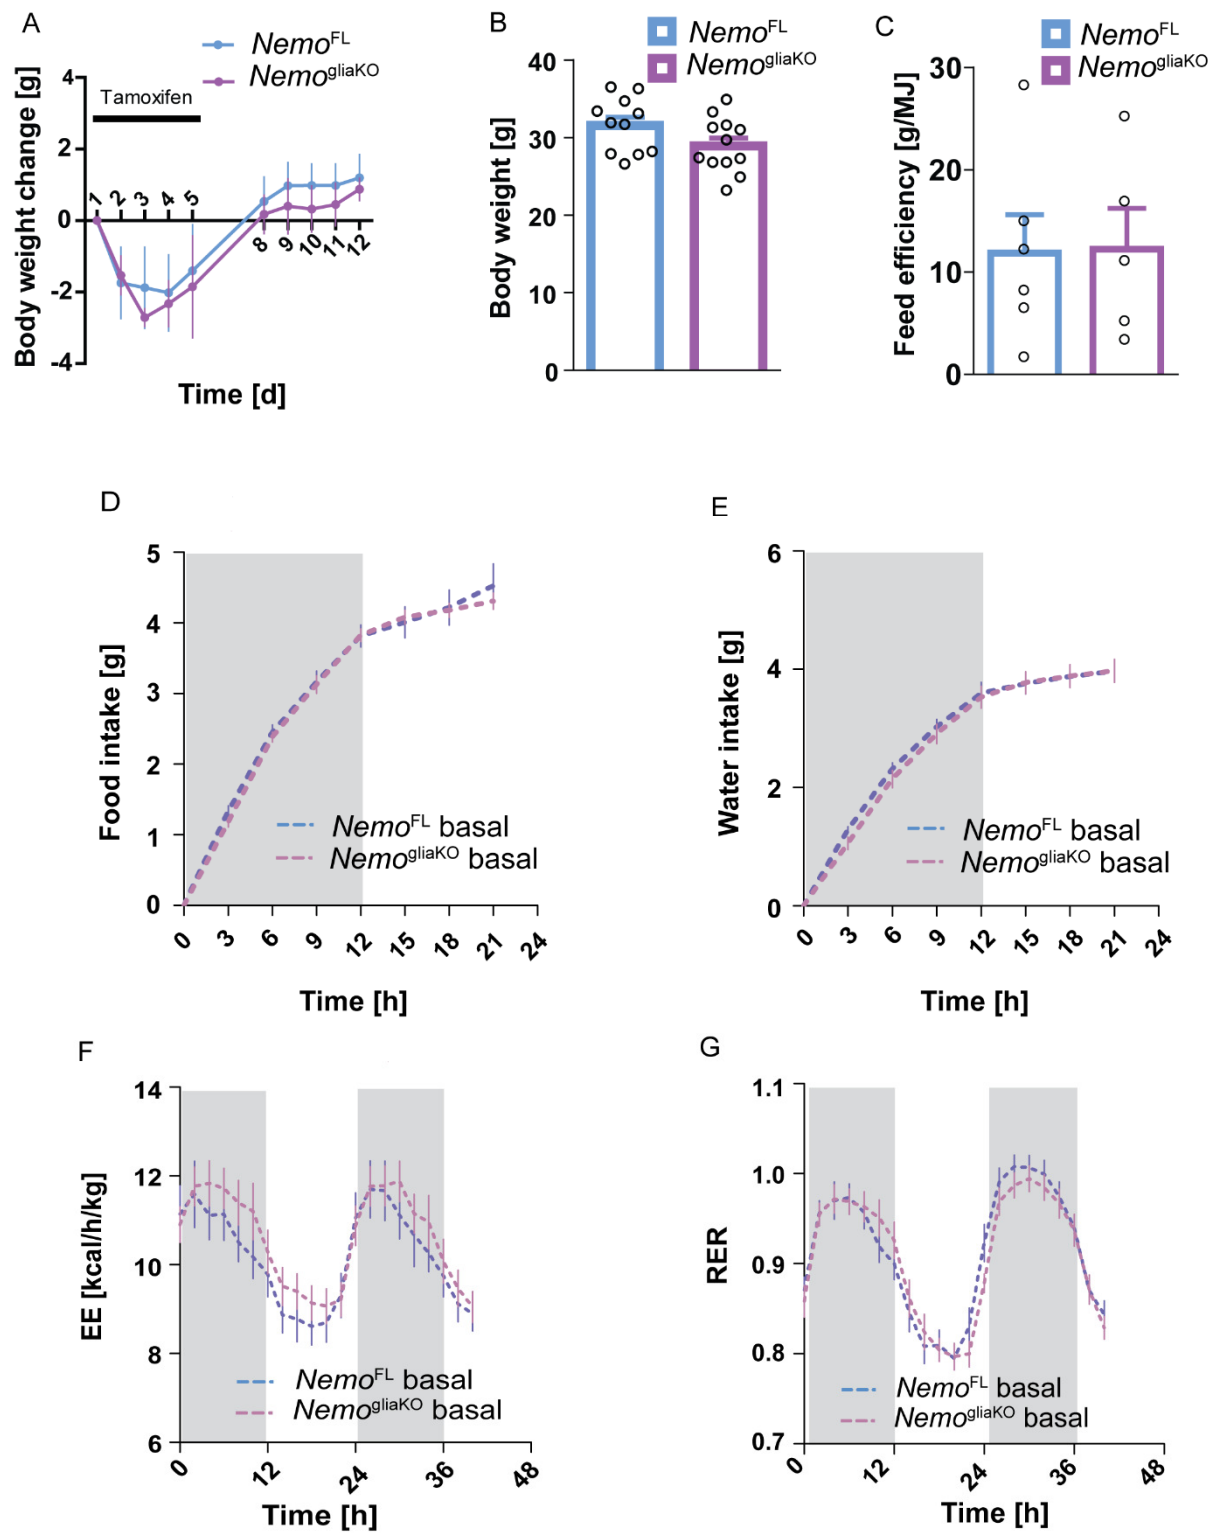

Supplementary Figure 6

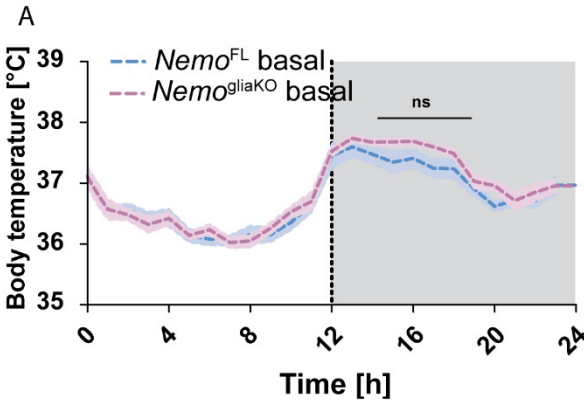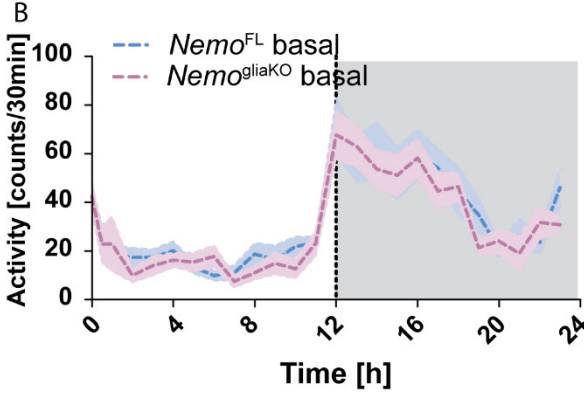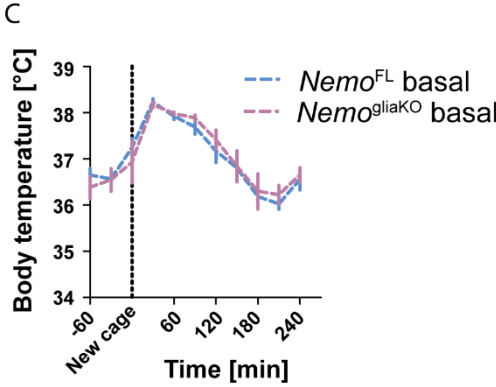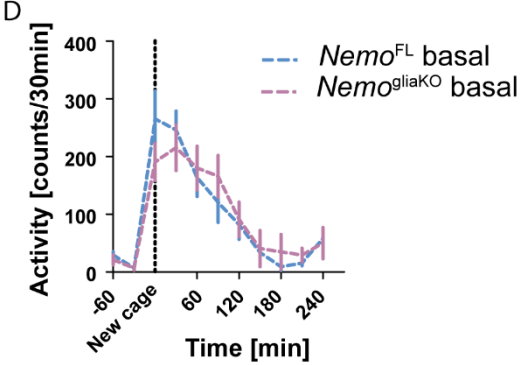

Supplementary Figure 7

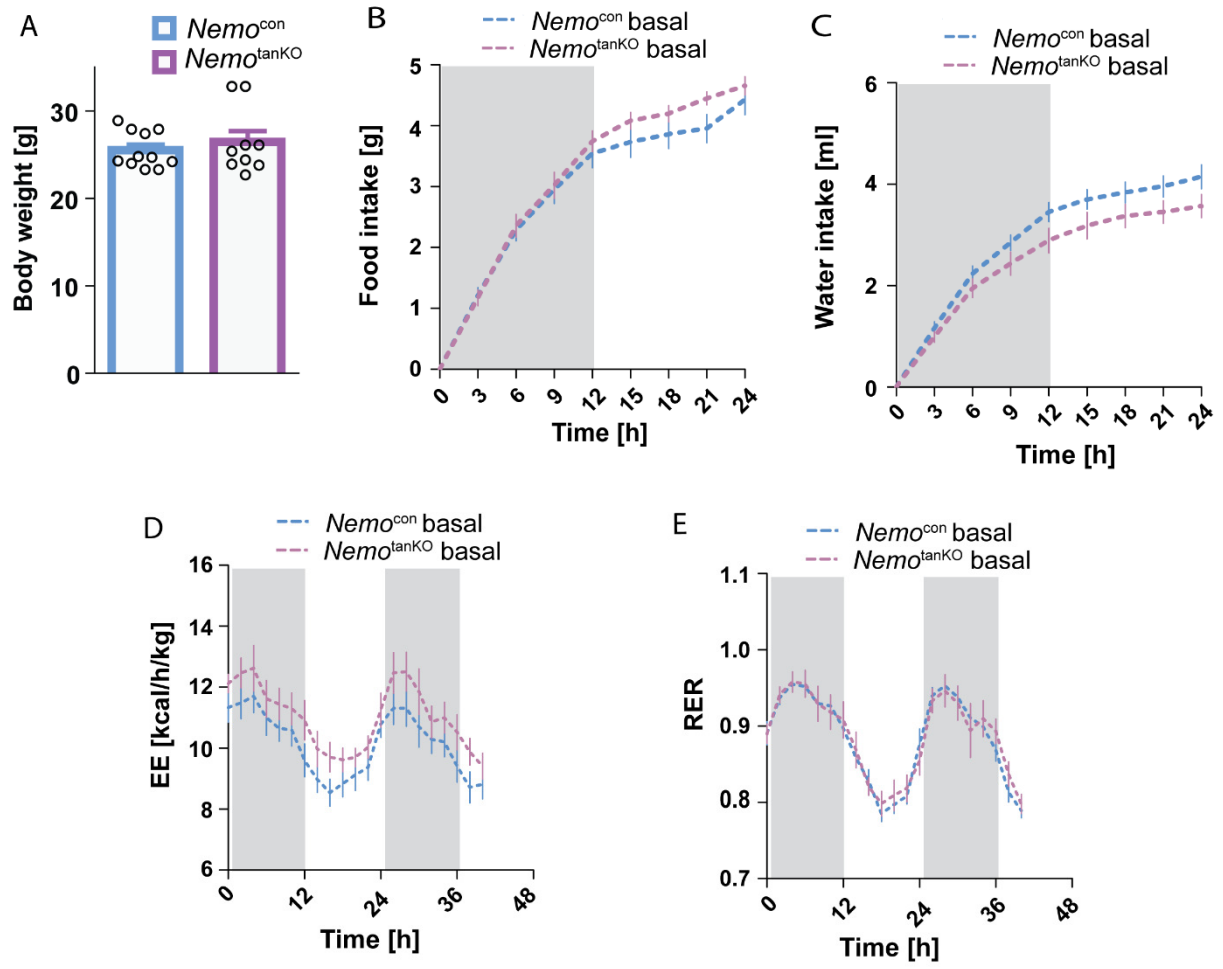

Supplement: mmc2.pdf [file mmc2.pdf]
